# Supplementary figures and images for: Interaction Studies between Newly Synthesized Photosensitive Polymer and Ionic Liquids
Source: Hindawi journal article supplement (doi:10.1155/2015/461974), 2015-01-01

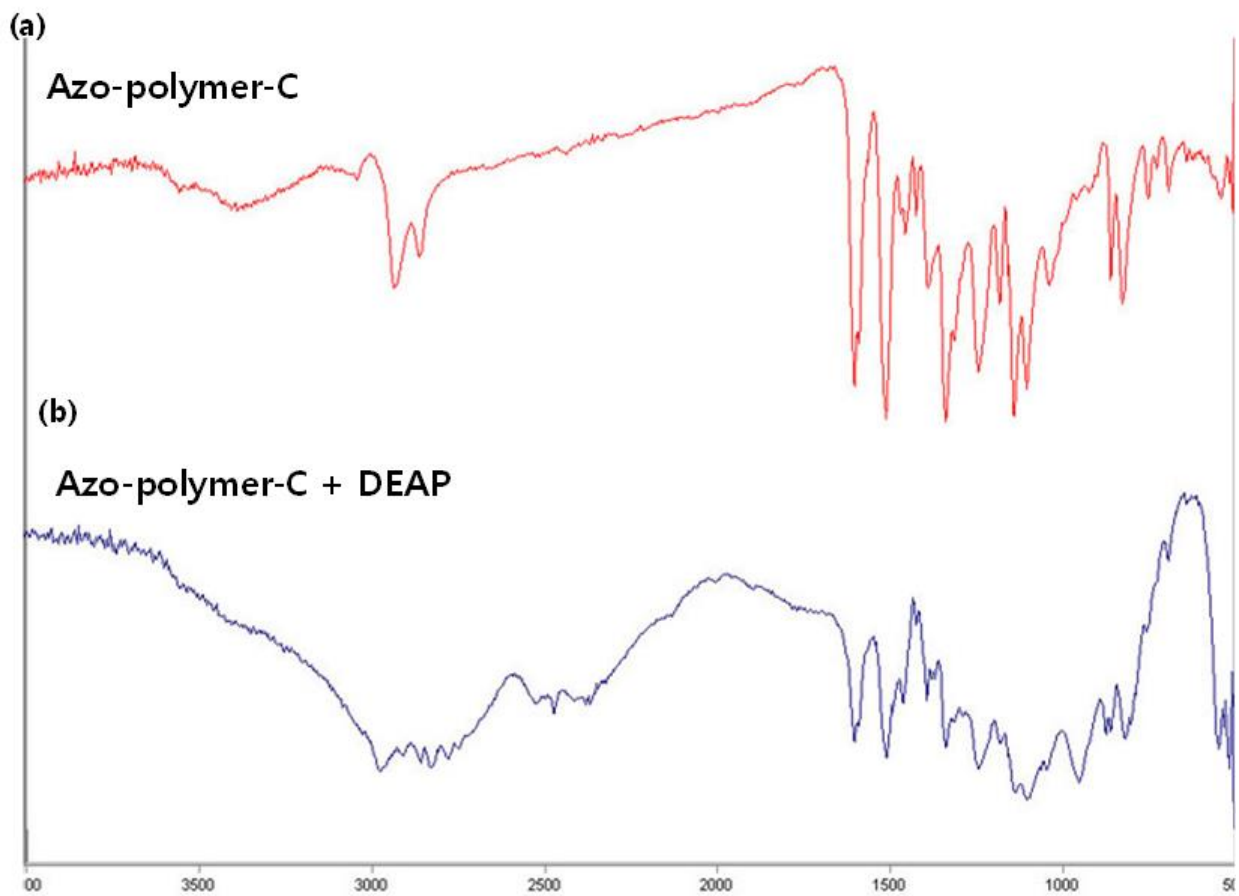

**Azo-polymer-C**

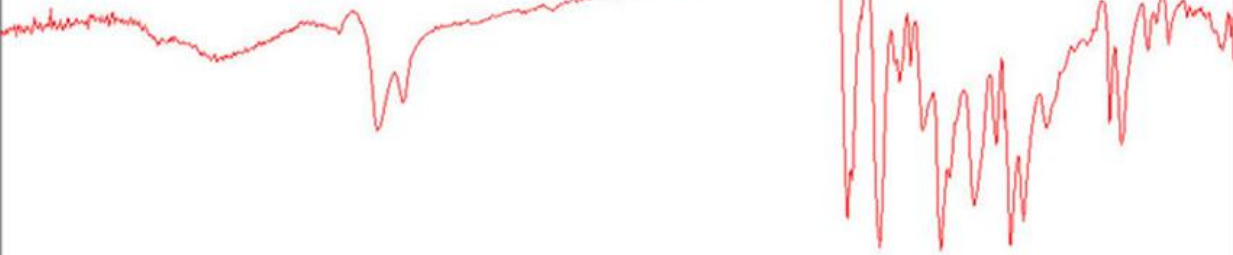

**Azo-polymer-C + TASA**

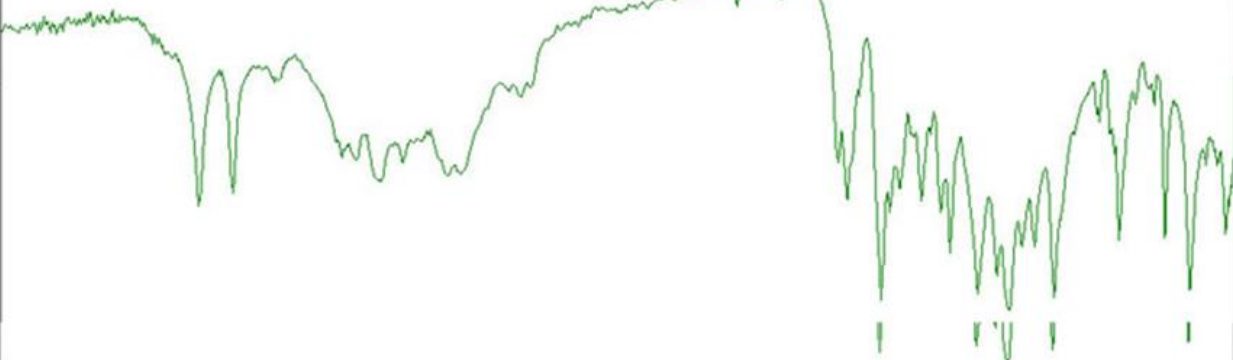

00 3500 3000 2500 2000 1500 1000 500

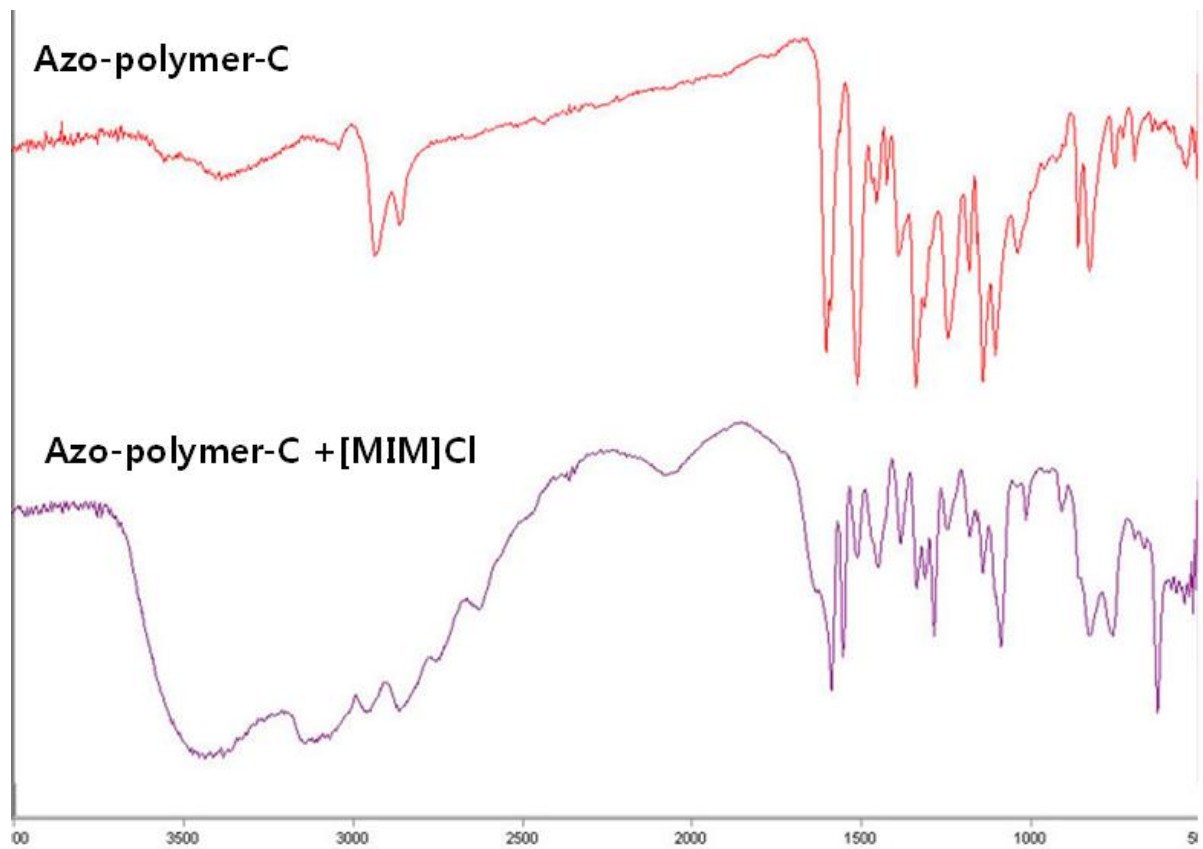

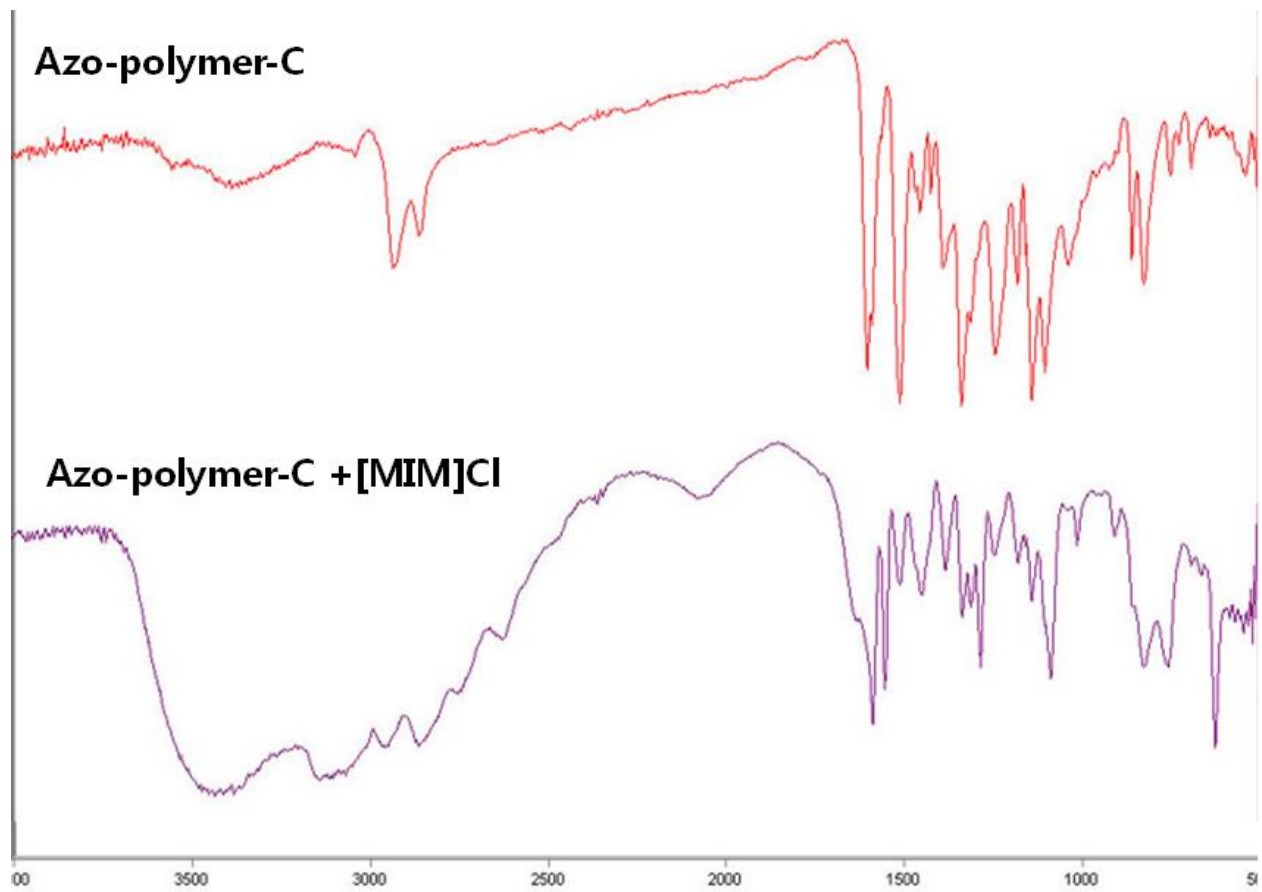

Supplement: f1 [file 461974.f1.pdf]
